# Supplementary material for: CNTs@Fe–N–C core–shell nanostructures as active electrocatalyst for oxygen reduction
Source: Royal Society of Chemistry journal article supplement (doi:10.1039/c4ta01237b), 2014-04-22
Supplement: c4ta01237b1.pdf [file c4ta01237b1.pdf]

Table S1. Textural parameters of CNTs, CNTs@P-PI and CNTs@Fe-N-C-700 (7 wt% Fe).

|                               | BET surface area<br>(m <sup>2</sup> /g) | t-Plot Microporous surface area<br>(m <sup>2</sup> /g) |
|-------------------------------|-----------------------------------------|--------------------------------------------------------|
| Pristine CNTs                 | 148.1                                   | 16.34                                                  |
| CNTs@P-PI                     | 82.4                                    | -                                                      |
| CNTs@Fe-N-C-700<br>(7 wt% Fe) | 162.7                                   | 63.45                                                  |

Table S2. Relative content of different N species to total N parameters for CNTs@Fe-N-C with different Fe loading based on XPS and elemental analysis

|                 | Fe loading |        |        |
|-----------------|------------|--------|--------|
|                 | 7 wt%      | 18 wt% | 25 wt% |
| Pyridinic N (%) | 26%        | 29%    | 38%    |
| Pyrrolic N (%)  | 31%        | 14%    | 13%    |
| Graphitic N (%) | 43%        | 56%    | 49%    |

Table S3. Mössbauer parameters for CNTs@Fe-N-C-700 catalysts with different iron loadings at room temperature.

|        | Isomer shift $\delta$<br>(mm/s) |      |      | Quadrupole splitting<br>$\Delta E$<br>(mm/s) |      |      | Line width<br>(mm/s) |      |       | Rel area A<br>(%) |       |       |
|--------|---------------------------------|------|------|----------------------------------------------|------|------|----------------------|------|-------|-------------------|-------|-------|
|        | Fe loading (wt%)                |      |      |                                              |      |      |                      |      |       |                   |       |       |
|        | 7                               | 18   | 25   | 7                                            | 18   | 25   | 7                    | 18   | 25    | 7                 | 18    | 25    |
| D 1    | 0.38                            | 0.37 | 0.37 | 1.27                                         | 1.26 | 1.43 | 1.04                 | 1.12 | 1.14  | 40.96<br>4        | 19.51 | 13.55 |
| Sext 1 | 0.28                            | 0.27 | 0.27 | 0.07                                         | 0.02 | 0.02 | 0.30                 | 0.29 | 0.25  | 23.36             | 29.83 | 32.67 |
| Sext 2 | 0.66                            | 0.66 | 0.66 | 0.14                                         | 0.16 | 0.08 | 0.33                 | 0.38 | 0.291 | 35.69             | 50.65 | 53.77 |

<sup>a</sup> D 1: FeN<sub>4</sub>, 3d<sup>6</sup>, low spin;<sup>1-3</sup>

Sext 1: Fe<sub>3</sub>O<sub>4</sub>, Fe<sup>3+</sup> in A-sites;<sup>4</sup>

Sext 2: Fe<sub>3</sub>O<sub>4</sub>, Fe<sup>3+</sup>+Fe<sup>2+</sup> in B-sites.<sup>4</sup>

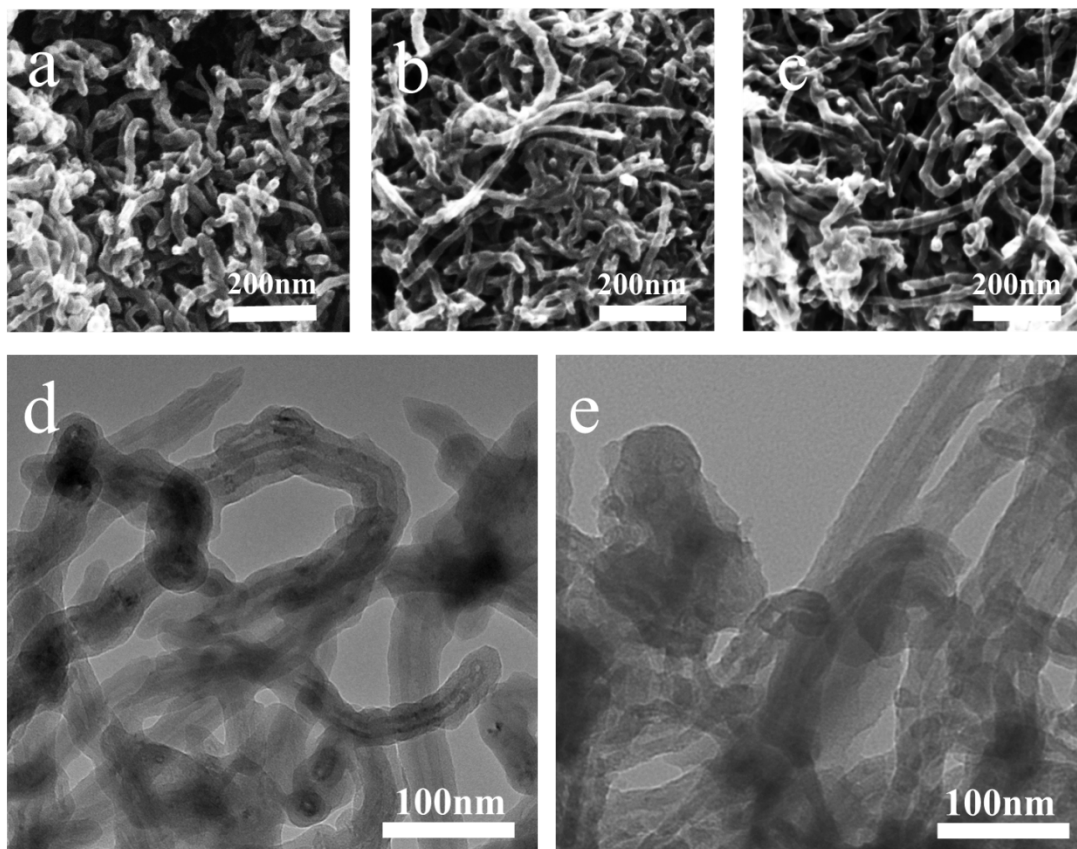

Fig. S1 SEM images of (a) pristine carboxyl CNTs; (b) CNTs@P-PI; (c) CNTs@Fe-N-C 700 (Fe 7 wt%).

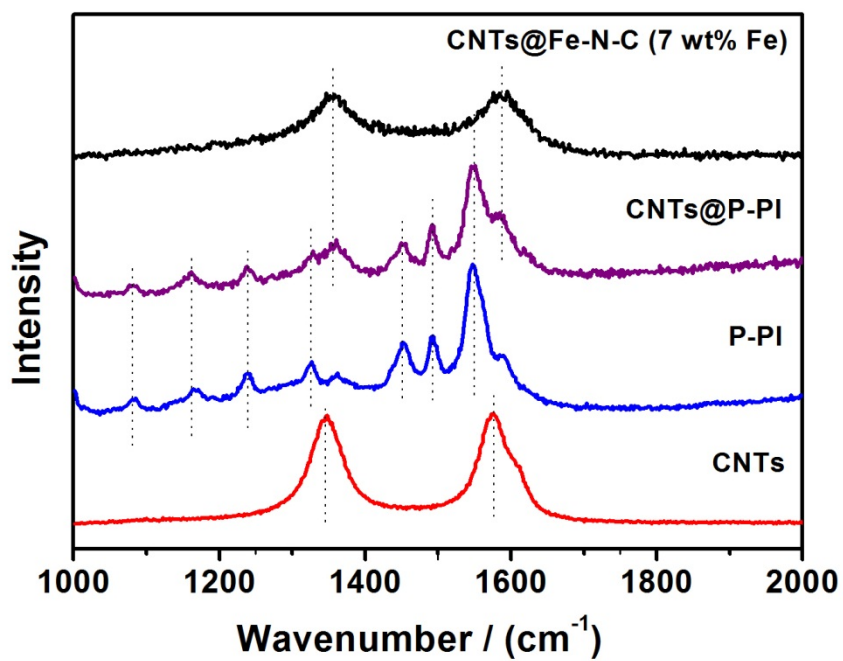

Fig. S2 Raman spectra of pristine carboxyl CNTs (CNTs), pure polymer (P-PI), CNTs@P-PI, and CNTs@Fe-N-C 700 (Fe 7 wt%).

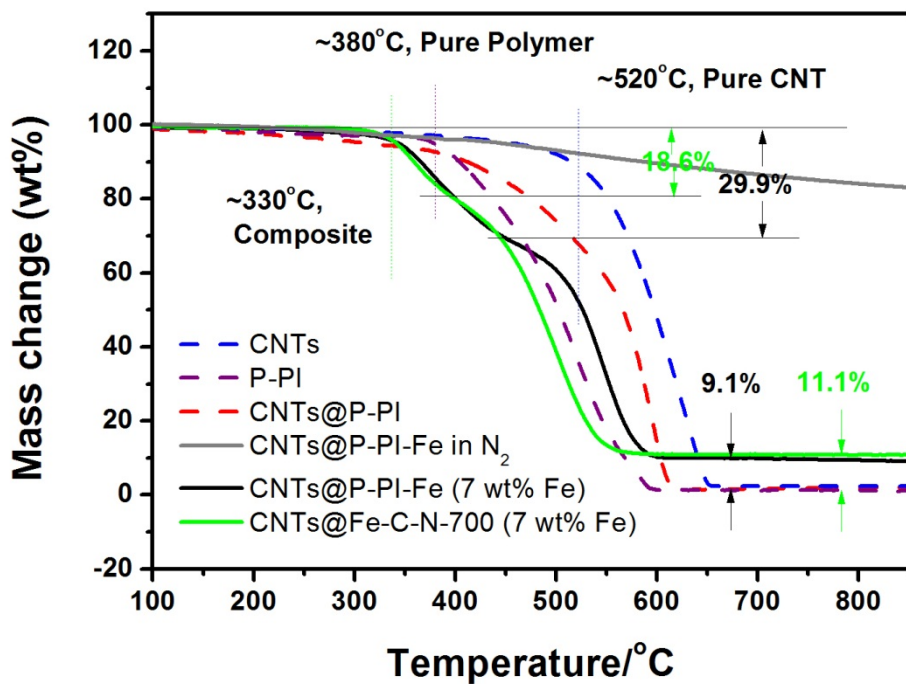

Fig. S3 Thermo gravity analysis results of pristine carboxyl CNTs, pure polymer (P-PI), CNTs@P-PI, CNTs@P-PI-Fe (after loading FeCl<sub>3</sub>) and CNTs@Fe-N-C-700 (Fe 7 wt%).

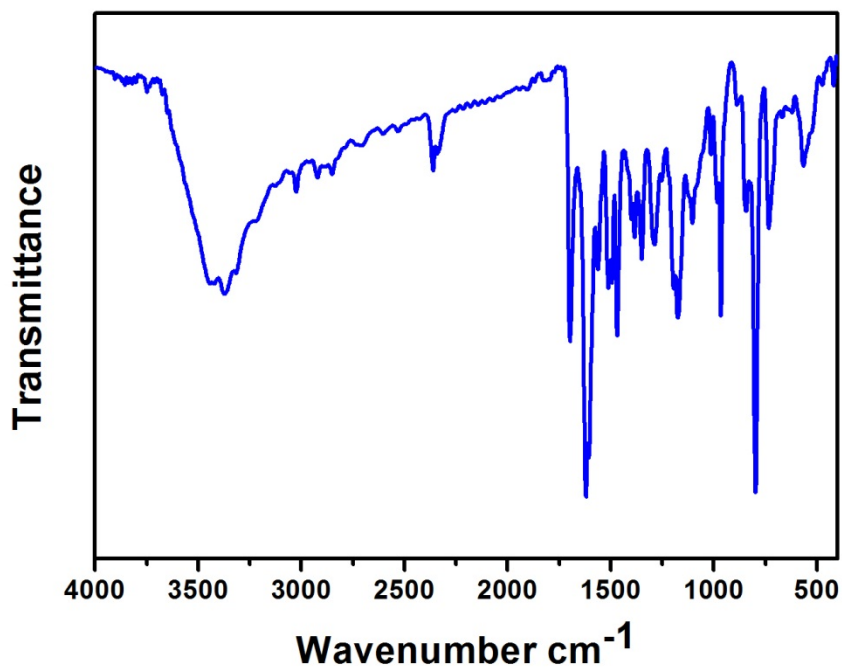

Fig. S4 FT-IR spectrum of P-PI.

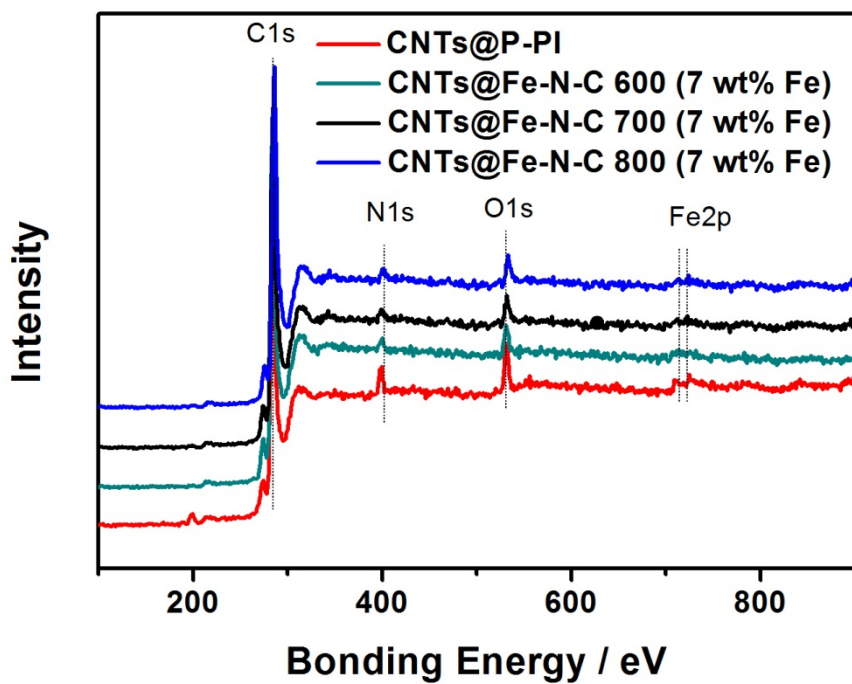

Fig. S5 XPS survey of CNTs@P-PI-Fe, CNTs@Fe-N-C-600 (Fe 7 wt%), CNTs@Fe-N-C-700 (Fe 7 wt%) and CNTs@Fe-N-C-800 (Fe 7 wt%).

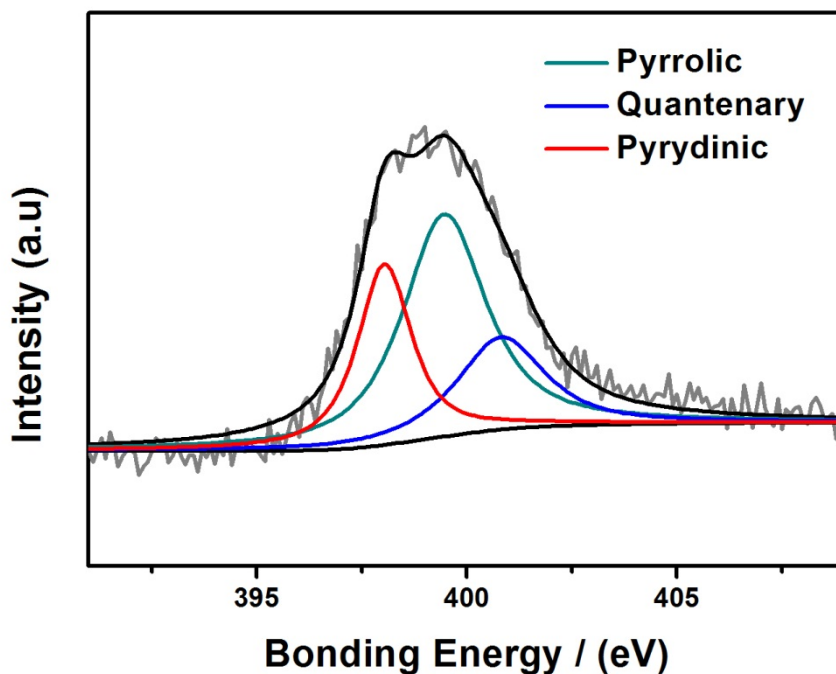

Fig. S6 N1s XPS spectra of CNTs@Fe-N-C-600 (Fe 7 wt%).

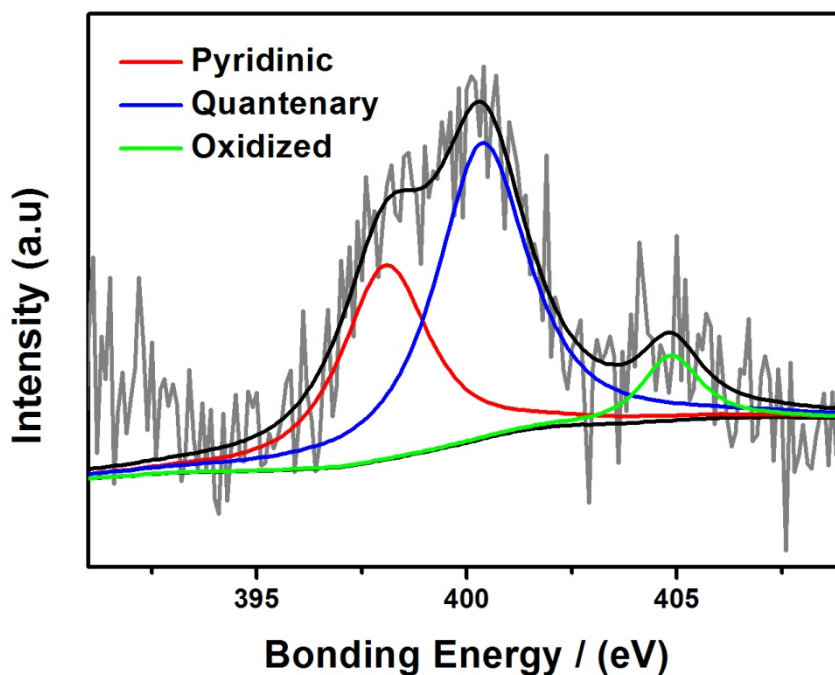

Fig. S7 N1s XPS spectra of CNTs@Fe-N-C-800 (Fe 7 wt%).

1. U. I. Kramm, J. Herranz, N. Larouche, T. M. Arruda, M. Lefevre, F. Jaouen, P. Bogdanoff, S. Fiechter, I. Abs-Wurmbach, S. Mukerjee and J.-P. Dodelet, *Phys Chem Chem Phys*, 2012, **14**, 11673-11688.
2. U. I. Kramm, I. Herrmann-Geppert, S. Fiechter, G. Zehl, I. Zizak, I. Dorbandt, Schmei and P. Bogdanoff, *Journal of Materials Chemistry A*, 2014.
3. M. Ferrandon, A. J. Kropf, D. J. Myers, K. Artyushkova, U. Kramm, P. Bogdanoff, G. Wu, C. M. Johnston and P. Zelenay, *The Journal of Physical Chemistry C*, 2012, **116**, 16001-16013.
4. I. S. Lyubutin, C. R. Lin, Y. V. Korzhetskiy, T. V. Dmitrieva and R. K. Chiang, *J Appl Phys*, 2009, **106**, -.
